# Supplementary material for: Xanthohumol Is a Potent Pan-Inhibitor of Coronaviruses Targeting Main Protease
Source: Int J Mol Sci. 2021 Nov 9;22(22):12134. doi: 10.3390/ijms222212134 (PMC8624673; doi:10.3390/ijms222212134)
Supplement: Supplementary file 1 [file ijms-22-12134-s001.zip › ijms-1419558-sm/Suplementary Data. The docking scores of Xanthohumol with Mpro.xlsx]

## Sheet: result_docking
Index	Coronavirus	PDB ID	LeDock Docking Score
1	Bat-CoV-HKU4	2YNA	-7.62
2	Bat-CoV-HKU4	2YNB	-7.56
3	Bat-CoV-HKU4	4YO9	-7.53
4	Bat-CoV-HKU4	4YOG	-7.58
5	Bat-CoV-HKU4	4YOI	-7.37
6	Bat-CoV-HKU4	4YOJ	-7.15
7	FIPV	4ZRO	-7.16
8	hCoV-229E	1P9S	-7.07
9	hCoV-229E	2ZU2	-7.17
10	hCoV-HKU1	3D23	-8
11	hCoV-NL63	3TLO	-6.68
12	hCoV-NL63	5NH0	-7.05
13	hCoV-NL63	6FV1	-7.56
14	hCoV-NL63	6FV2	-6.95
15	MERS-CoV	4RSP	-7.66
16	MERS-CoV	4WMD	-7.97
17	MERS-CoV	4WME	-9.35
18	MERS-CoV	4WMF	-10.22
19	MERS-CoV	4YLU	-7.97
20	MERS-CoV	5C3N	-7.29
21	MERS-CoV	5WKJ	-7.64
22	MERS-CoV	5WKK	-7.49
23	MERS-CoV	5WKL	-7.21
24	MERS-CoV	5WKM	-6.82
25	MERS-CoV	6VGY	-7.74
26	MERS-CoV	6VGZ	-7.57
27	MERS-CoV	6VH0	-7.63
28	MERS-CoV	6VH1	-7.76
29	MERS-CoV	6VH2	-7.94
30	MERS-CoV	6VH3	-8.05
31	MHV	6JIJ	-7.56
32	SARS-CoV	1Q2W	-7.25
33	SARS-CoV	1UJ1	-6.6
34	SARS-CoV	1UK2	-6.35
35	SARS-CoV	1UK3	-6.67
36	SARS-CoV	1UK4	-6.85
37	SARS-CoV	1WOF	-8.09
38	SARS-CoV	1Z1I	-7.04
39	SARS-CoV	1Z1J	-7.71
40	SARS-CoV	2A5A	-7.41
41	SARS-CoV	2A5I	-8.14
42	SARS-CoV	2A5K	-8.25
43	SARS-CoV	2ALV	-7.64
44	SARS-CoV	2AMD	-7.88
45	SARS-CoV	2AMQ	-8.44
46	SARS-CoV	2C3S	-7.38
47	SARS-CoV	2D2D	-7.99
48	SARS-CoV	2DUC	-7.57
49	SARS-CoV	2GT7	-6.81
50	SARS-CoV	2GT8	-6.38
51	SARS-CoV	2GTB	-7.94
52	SARS-CoV	2GX4	-7.76
53	SARS-CoV	2GZ7	-7.94
54	SARS-CoV	2GZ8	-8.14
55	SARS-CoV	2GZ9	-7.06
56	SARS-CoV	2H2Z	-7.01
57	SARS-CoV	2HOB	-7.74
58	SARS-CoV	2OP9	-7.79
59	SARS-CoV	2QCY	-6.4
60	SARS-CoV	2QIQ	-8.1
61	SARS-CoV	2V6N	-7.63
62	SARS-CoV	2VJ1	-7.14
63	SARS-CoV	2Z3E	-7.41
64	SARS-CoV	2Z94	-7.41
65	SARS-CoV	2Z9G	-6.98
66	SARS-CoV	2Z9J	-7
67	SARS-CoV	2Z9K	-7.1
68	SARS-CoV	2Z9L	-6.84
69	SARS-CoV	2ZU4	-7.6
70	SARS-CoV	2ZU5	-8.07
71	SARS-CoV	3ATW	-8.51
72	SARS-CoV	3AVZ	-7.97
73	SARS-CoV	3AW0	-8.07
74	SARS-CoV	3AW1	-6.98
75	SARS-CoV	3D62	-7.37
76	SARS-CoV	3E91	-6.76
77	SARS-CoV	3EA7	-6.99
78	SARS-CoV	3EA8	-7.11
79	SARS-CoV	3EA9	-7.23
80	SARS-CoV	3EAJ	-6.87
81	SARS-CoV	3F9E	-6.45
82	SARS-CoV	3F9F	-6.98
83	SARS-CoV	3F9G	-6.47
84	SARS-CoV	3F9H	-6.44
85	SARS-CoV	3FZD	-6.32
86	SARS-CoV	3IWM	-7.9
87	SARS-CoV	3M3S	-6.91
88	SARS-CoV	3M3T	-7.37
89	SARS-CoV	3M3V	-6.46
90	SARS-CoV	3SN8	-7.18
91	SARS-CoV	3SNA	-7.61
92	SARS-CoV	3SNB	-7.43
93	SARS-CoV	3SNC	-7.43
94	SARS-CoV	3SND	-7.63
95	SARS-CoV	3SNE	-7.71
96	SARS-CoV	3SZN	-7.83
97	SARS-CoV	3TIT	-7.54
98	SARS-CoV	3TIU	-7.54
99	SARS-CoV	3TNS	-7.8
100	SARS-CoV	3TNT	-8.19
101	SARS-CoV	3V3M	-7.67
102	SARS-CoV	3VB3	-7.49
103	SARS-CoV	3VB4	-7.91
104	SARS-CoV	3VB5	-8
105	SARS-CoV	3VB6	-7.94
106	SARS-CoV	3VB7	-8.17
107	SARS-CoV	4HI3	-7.81
108	SARS-CoV	4MDS	-6.85
109	SARS-CoV	4TWW	-7.97
110	SARS-CoV	4TWY	-7.23
111	SARS-CoV	4WY3	-8.14
112	SARS-CoV	5C5N	-7.19
113	SARS-CoV	5C5O	-7.31
114	SARS-CoV	5N19	-7.44
115	SARS-CoV	5N5O	-7.68
116	SARS-CoV	6LNQ	-8.22
117	SARS-CoV	6LNY	-7.91
118	SARS-CoV	6LO0	-8.3
119	SARS-CoV	6W2A	-7.95
120	SARS-CoV	6XHL	-8.2
121	SARS-CoV	6XHN	-7.81
122	SARS-CoV	6XHO	-8.07
123	SARS-CoV	6Y7M	-8.05
124	SARS-CoV-2	5R7Y	-8.12
125	SARS-CoV-2	5R7Z	-7.82
126	SARS-CoV-2	5R80	-7.45
127	SARS-CoV-2	5R81	-7.4
128	SARS-CoV-2	5R82	-7.39
129	SARS-CoV-2	5R83	-7.45
130	SARS-CoV-2	5R84	-7.76
131	SARS-CoV-2	5R8T	-7.36
132	SARS-CoV-2	5RE4	-7.11
133	SARS-CoV-2	5RE5	-7.12
134	SARS-CoV-2	5RE6	-7.22
135	SARS-CoV-2	5RE7	-7.22
136	SARS-CoV-2	5RE8	-7.14
137	SARS-CoV-2	5RE9	-7.85
138	SARS-CoV-2	5REA	-7.58
139	SARS-CoV-2	5REB	-7.26
140	SARS-CoV-2	5REC	-6.99
141	SARS-CoV-2	5RED	-7.28
142	SARS-CoV-2	5REE	-7.1
143	SARS-CoV-2	5REF	-6.92
144	SARS-CoV-2	5REG	-7.87
145	SARS-CoV-2	5REH	-7.47
146	SARS-CoV-2	5REI	-7.12
147	SARS-CoV-2	5REJ	-7.22
148	SARS-CoV-2	5REK	-6.92
149	SARS-CoV-2	5REL	-7.55
150	SARS-CoV-2	5REM	-7.67
151	SARS-CoV-2	5REN	-7.96
152	SARS-CoV-2	5REO	-7.8
153	SARS-CoV-2	5REP	-7.08
154	SARS-CoV-2	5RER	-7.72
155	SARS-CoV-2	5RES	-7.91
156	SARS-CoV-2	5RET	-7.89
157	SARS-CoV-2	5REU	-7.68
158	SARS-CoV-2	5REV	-7.06
159	SARS-CoV-2	5REW	-7.16
160	SARS-CoV-2	5REX	-7.98
161	SARS-CoV-2	5REY	-7.43
162	SARS-CoV-2	5REZ	-7.28
163	SARS-CoV-2	5RF0	-7.09
164	SARS-CoV-2	5RF1	-7.72
165	SARS-CoV-2	5RF2	-7.67
166	SARS-CoV-2	5RF3	-7.43
167	SARS-CoV-2	5RF4	-7.78
168	SARS-CoV-2	5RF5	-7.31
169	SARS-CoV-2	5RF6	-6.79
170	SARS-CoV-2	5RF7	-7.36
171	SARS-CoV-2	5RF8	-7.26
172	SARS-CoV-2	5RF9	-7.17
173	SARS-CoV-2	5RFA	-7.08
174	SARS-CoV-2	5RFB	-7.29
175	SARS-CoV-2	5RFC	-7.02
176	SARS-CoV-2	5RFD	-7.29
177	SARS-CoV-2	5RFE	-7.61
178	SARS-CoV-2	5RFF	-7.58
179	SARS-CoV-2	5RFG	-7.77
180	SARS-CoV-2	5RFH	-6.95
181	SARS-CoV-2	5RFI	-7.58
182	SARS-CoV-2	5RFJ	-8.19
183	SARS-CoV-2	5RFK	-7.56
184	SARS-CoV-2	5RFL	-7.62
185	SARS-CoV-2	5RFM	-7.27
186	SARS-CoV-2	5RFN	-7.41
187	SARS-CoV-2	5RFO	-7.16
188	SARS-CoV-2	5RFP	-6.79
189	SARS-CoV-2	5RFQ	-7.69
190	SARS-CoV-2	5RFR	-7.65
191	SARS-CoV-2	5RFS	-7.57
192	SARS-CoV-2	5RFT	-7.7
193	SARS-CoV-2	5RFU	-7.22
194	SARS-CoV-2	5RFV	-7.56
195	SARS-CoV-2	5RFW	-7.57
196	SARS-CoV-2	5RFX	-7.18
197	SARS-CoV-2	5RFY	-7.53
198	SARS-CoV-2	5RFZ	-8.12
199	SARS-CoV-2	5RG0	-7.51
200	SARS-CoV-2	5RG1	-7.17
201	SARS-CoV-2	5RG2	-6.92
202	SARS-CoV-2	5RG3	-6.89
203	SARS-CoV-2	5RGG	-7.14
204	SARS-CoV-2	5RGH	-7.95
205	SARS-CoV-2	5RGI	-8.84
206	SARS-CoV-2	5RGJ	-7.1
207	SARS-CoV-2	5RGK	-7.63
208	SARS-CoV-2	5RGL	-8.09
209	SARS-CoV-2	5RGM	-7.74
210	SARS-CoV-2	5RGN	-7.23
211	SARS-CoV-2	5RGO	-8.13
212	SARS-CoV-2	5RGP	-7.5
213	SARS-CoV-2	5RGQ	-7.01
214	SARS-CoV-2	5RGR	-7.1
215	SARS-CoV-2	5RGS	-6.86
216	SARS-CoV-2	5RGT	-7.42
217	SARS-CoV-2	5RGU	-8.21
218	SARS-CoV-2	5RGV	-7.26
219	SARS-CoV-2	5RGW	-7.86
220	SARS-CoV-2	5RGX	-7.08
221	SARS-CoV-2	5RGY	-7.41
222	SARS-CoV-2	5RGZ	-8.01
223	SARS-CoV-2	5RH0	-7.18
224	SARS-CoV-2	5RH1	-7.66
225	SARS-CoV-2	5RH2	-6.78
226	SARS-CoV-2	5RH3	-7
227	SARS-CoV-2	5RH4	-7.8
228	SARS-CoV-2	5RH5	-7.58
229	SARS-CoV-2	5RH6	-7.33
230	SARS-CoV-2	5RH7	-7.51
231	SARS-CoV-2	5RH8	-7.61
232	SARS-CoV-2	5RH9	-7.53
233	SARS-CoV-2	5RHA	-7.67
234	SARS-CoV-2	5RHB	-7.4
235	SARS-CoV-2	5RHC	-7.62
236	SARS-CoV-2	5RHD	-7.51
237	SARS-CoV-2	5RHE	-7.9
238	SARS-CoV-2	5RHF	-7.57
239	SARS-CoV-2	5RL0	-7.5
240	SARS-CoV-2	5RL1	-7.59
241	SARS-CoV-2	5RL2	-7.32
242	SARS-CoV-2	5RL3	-7.56
243	SARS-CoV-2	5RL4	-7.58
244	SARS-CoV-2	5RL5	-7.58
245	SARS-CoV-2	6LU7	-7.69
246	SARS-CoV-2	6LZE	-7.36
247	SARS-CoV-2	6M03	-6.74
248	SARS-CoV-2	6M0K	-7.38
249	SARS-CoV-2	6M2N	-8.18
250	SARS-CoV-2	6M2Q	-7.23
251	SARS-CoV-2	6W63	-7.13
252	SARS-CoV-2	6W79	-7.1
253	SARS-CoV-2	6WNP	-7.38
254	SARS-CoV-2	6WQF	-7.62
255	SARS-CoV-2	6WTJ	-8.25
256	SARS-CoV-2	6WTK	-7.82
257	SARS-CoV-2	6WTM	-7.49
258	SARS-CoV-2	6WTT	-8.18
259	SARS-CoV-2	6XA4	-7.88
260	SARS-CoV-2	6XB2	-7.42
261	SARS-CoV-2	6XBG	-8.69
262	SARS-CoV-2	6XBH	-7.92
263	SARS-CoV-2	6XBI	-7.81
264	SARS-CoV-2	6XCH	-7.64
265	SARS-CoV-2	6XFN	-6.94
266	SARS-CoV-2	6XHM	-7.96
267	SARS-CoV-2	6XHU	-6.91
268	SARS-CoV-2	6XMK	-7.9
269	SARS-CoV-2	6XQS	-6.9
270	SARS-CoV-2	6XQT	-7.42
271	SARS-CoV-2	6XQU	-7.22
272	SARS-CoV-2	6XR3	-7.57
273	SARS-CoV-2	6Y2E	-7.56
274	SARS-CoV-2	6Y2F	-7.53
275	SARS-CoV-2	6Y2G	-7.54
276	SARS-CoV-2	6Y84	-7.59
277	SARS-CoV-2	6YB7	-8.02
278	SARS-CoV-2	6YNQ	-7.87
279	SARS-CoV-2	6YT8	-7.81
280	SARS-CoV-2	6YVF	-7.17
281	SARS-CoV-2	6YZ6	-8.05
282	SARS-CoV-2	6Z2E	-8.26
283	SARS-CoV-2	6ZRT	-7.68
284	SARS-CoV-2	6ZRU	-7.12
285	SARS-CoV-2	7A1U	-7.4
286	SARS-CoV-2	7ABU	-7.55
287	SARS-CoV-2	7ADW	-7.29
288	SARS-CoV-2	7AF0	-7.23
289	SARS-CoV-2	7AGA	-7.7
290	SARS-CoV-2	7AHA	-8.28
291	SARS-CoV-2	7AK4	-7.89
292	SARS-CoV-2	7AKU	-8.01
293	SARS-CoV-2	7ALH	-7.38
294	SARS-CoV-2	7ALI	-7.34
295	SARS-CoV-2	7AMJ	-7.7
296	SARS-CoV-2	7ANS	-8.2
297	SARS-CoV-2	7AOL	-7.76
298	SARS-CoV-2	7AP6	-7.83
299	SARS-CoV-2	7APH	-8.21
300	SARS-CoV-2	7AQI	-8.79
301	SARS-CoV-2	7AQJ	-8.35
302	SARS-CoV-2	7AR5	-8.59
303	SARS-CoV-2	7AR6	-8.61
304	SARS-CoV-2	7AVD	-7.35
305	SARS-CoV-2	7AWR	-8.02
306	SARS-CoV-2	7AWS	-9.75
307	SARS-CoV-2	7AWW	-7.97
308	SARS-CoV-2	7AX6	-7.59
309	SARS-CoV-2	7AXM	-8.18
310	SARS-CoV-2	7AXO	-7.66
311	SARS-CoV-2	7AY7	-8.24
312	SARS-CoV-2	7B3E	-6.74
313	SARS-CoV-2	7B83	-7.8
314	SARS-CoV-2	7BQY	-7.8
315	SARS-CoV-2	7BRO	-7.68
316	SARS-CoV-2	7BRP	-7.3
317	SARS-CoV-2	7BRR	-8.02
318	SARS-CoV-2	7BUY	-7.44
319	SARS-CoV-2	7C2Q	-7.08
320	SARS-CoV-2	7C2Y	-6.92
321	SARS-CoV-2	7C6S	-7.13
322	SARS-CoV-2	7C6U	-8.15
323	SARS-CoV-2	7C7P	-6.92
324	SARS-CoV-2	7C8B	-7.7
325	SARS-CoV-2	7C8R	-7.96
326	SARS-CoV-2	7C8T	-7.56
327	SARS-CoV-2	7C8U	-7.8
328	SARS-CoV-2	7CBT	-8.55
329	SARS-CoV-2	7COM	-7.18
330	SARS-CoV-2	7CWB	-7.24
331	SARS-CoV-2	7CWC	-6.9
332	SARS-CoV-2	7CX9	-7.85
333	SARS-CoV-2	7D1M	-8.97
334	SARS-CoV-2	7D1O	-7.68
335	SARS-CoV-2	7D3I	-7.2
336	SARS-CoV-2	7JFQ	-7.69
337	SARS-CoV-2	7JKV	-8.08
338	SARS-CoV-2	7JOX	-7.28
339	SARS-CoV-2	7JP1	-7.3
340	SARS-CoV-2	7JPY	-7.53
341	SARS-CoV-2	7JPZ	-7.51
342	SARS-CoV-2	7JQ0	-7.92
343	SARS-CoV-2	7JQ1	-7.7
344	SARS-CoV-2	7JQ2	-7.73
345	SARS-CoV-2	7JQ3	-7.83
346	SARS-CoV-2	7JQ4	-7.61
347	SARS-CoV-2	7JQ5	-7.6
348	SARS-CoV-2	7JR3	-7.44
349	SARS-CoV-2	7JR4	-7.1
350	SARS-CoV-2	7JU7	-7.32
351	SARS-CoV-2	7JVZ	-8.16
352	SARS-CoV-2	7JYC	-7.8
353	SARS-CoV-2	7K0F	-8.12
354	SARS-CoV-2	7K3T	-8.26
355	SARS-CoV-2	7K40	-7.36
356	SARS-CoV-2	7K6D	-7.68
357	SARS-CoV-2	7K6E	-7.02
358	SARS-CoV-2	7KFI	-6.4
359	SARS-CoV-2	7KFJ	-6.37
360	SARS-CoV-2	7KHP	-7.23
361	SARS-CoV-2	7KPH	-7.1
362	SARS-CoV-2	7KS5	-7.55
363	SARS-CoV-2	7KVL	-6.65
364	SARS-CoV-2	7KVR	-7.01
365	SARS-CoV-2	7KW5	-6.71
366	SARS-CoV-2	7KX5	-7.87
367	SARS-CoV-2	7KYU	-7.64
368	SARS-CoV-2	7L0D	-7.32
369	SARS-CoV-2	7L5D	-7.26
370	SARS-CoV-2	7LBN	-7.4
371	SARS-CoV-2	7LDX	-6.9
372	SARS-CoV-2	7LFE	-7.32
373	SARS-CoV-2	7LFP	-7.17
374	SARS-CoV-2	7LKS	-7.64
375	TGEV	1LVO	-6.74
376	TGEV	1P9U	-6.47
377	TGEV	2AMP	-7.03
378	TGEV	4F49	-7.44
